# Supplementary material for: Genetic Diversity of O-Antigens in Hafnia alvei and the Development of a Suspension Array for Serotype Detection
Source: PLoS One. 2016 May 12;11(5):e0155115. doi: 10.1371/journal.pone.0155115 (PMC4869667; doi:10.1371/journal.pone.0155115)
Supplement: S5 Table — (DOCX) [file pone.0155115.s007.docx]

**Table S5. The GT names and HGs**

| **Strains** | **GT Names** | **Homology Groups** | **Fuctions** |
| --- | --- | --- | --- |
| PCM1188 | *whaA* | HG06 |  |
| *whaB* | HG08 | Gal-(β1-3)-GlcNAc |
| *whaC* | HG09 | Man-(α1-4)-Gal |
| *whaD* | HG40 |  |
| PCM1189 | *whaE* | HG04 |  |
| *whaF* | HG08 |  |
| *whaG* | HG10 |  |
| *whaH* | HG11 |  |
| PCM1191 | *whaI* | HG05 |  |
| *whaJ* | HG08 | Gal-(β1-3)-GalNAc |
| *whaK* | HG13 |  |
| *whaL* | HG14 |  |
| *whaM* | HG31 |  |
| PCM1192 | *whaN* | HG14 |  |
| *whaO* | HG15 | L-Rha-(β1-4)- |
| *whaP* | HG16 |  |
| *whaQ* | HG17 |  |
| *whaR* | HG31 |  |
| PCM1194 | *whaS* | HG01 |  |
| *whaT* | HG30 |  |
| *whaU* | HG35 |  |
| *whaV* | HG49 |  |
| *whaW* | HG50 |  |
| PCM1196 | *whaX* | HG03 |  |
| *whaY* | HG04 |  |
| *whaZ* | HG14 |  |
| *whbA* | HG18 |  |
| PCM1198 | *whbB* | HG06 |  |
| *whbC* | HG08 |  |
| *whbD* | HG32 |  |
| *whbE* | HG33 |  |
| PCM1202 | *whbF* | HG05 |  |
| *whbG* | HG08 |  |
| *whbH* | HG13 |  |
| *whbI* | HG29 |  |
| PCM1204 | *whbK* | HG04 |  |
| *whbL* | HG06 |  |
| *whbM* | HG06 |  |
| *whbN* | HG08 |  |
| *whbO* | HG09 |  |
| PCM1209 | *whbP* | HG14 |  |
| *whbQ* | HG19 |  |
| *whbR* | HG20 |  |
| *whbS* | HG21 |  |
| PCM1210 | *whbT* | HG06 |  |
| *whaB* | HG08 | Gal-(β1-3)-GlcNAc |
| *whbU* | HG15 | L-Rha-(β1-4)- |
| *whbV* | HG24 |  |
| PCM1211 | *whbW* | HG03 |  |
| *whbX* | HG06 | GlcNAc-(α1-4)-GalNAc |
| *whbY* | HG14 |  |
| *whbZ* | HG25 |  |
| PCM1212 | *whcA* | HG03 |  |
| *whcB* | HG13 |  |
| *whcC* | HG36 |  |
| PCM1214 | *whcD* | HG05 |  |
| *whcE* | HG14 |  |
| *whcF* | HG38 |  |
| *whcG* | HG39 |  |
| PCM1216 | *whcH* | HG11 |  |
| *whcI* | HG22 |  |
| *whcJ* | HG22 |  |
| *whcK* | HG23 |  |
| PCM1218 | *whcL* | HG03 |  |
| *whcM* | HG08 |  |
| *whcN* | HG17 |  |
| *whcO* | HG37 |  |
| *whcP* | HG42 |  |
| PCM1220 | *whcQ* | HG02 |  |
| *whcR* | HG03 | Gal-(α1-3)-GlcNAc |
| *whcS* | HG04 |  |
| *whcT* | HG05 | Gro-(1-P-6)-Glc |
| *whcV* | HG01 |  |
| PCM1221 | *whcW* | HG04 |  |
| *whcX* | HG06 |  |
| *whcY* | HG07 |  |
| *whcZ* | HG49 | Glc-(α1-P-6)-GlcN(R3Hb) |
| PCM1222 | *whcR* | HG03 | Gal-(α1-3)-GlcNAc |
| *whdB* | HG12 |  |
| *whdC* | HG37 |  |
| PCM1223 | *whdD* | HG08 |  |
| *whdE* | HG14 |  |
| *whdF* | HG27 |  |
| *whdG* | HG28 |  |
| PCM1224 | *whbX* | HG06 | GlcNAc-(α1-4)-GalNAc |
| *whaJ* | HG08 | Gal-(β1-3)-GalNAc |
| *whdH* | HG24 |  |
| *whdI* | HG26 |  |
